# Supplementary material for: A photoelectron spectroscopy and quantum chemical study on ternary Al–B–O clusters: AlnBO2− and AlnBO2 (n = 2, 3)
Source: Royal Society of Chemistry journal article supplement (doi:10.1039/c7cp08512e), 2018-01-01

## SUPPLEMENTARY INFORMATION

### A Photoelectron Spectroscopy and Quantum Chemical Study on Ternary Al-B-O Clusters: $\text{Al}_n\text{BO}_2^-$ and $\text{Al}_n\text{BO}_2$ ( $n = 2, 3$ )<sup>†</sup>

Ting Ou,<sup>a</sup> Yuan Feng,<sup>b</sup> Wen-Juan Tian,<sup>a</sup> Li-Juan Zhao,<sup>b</sup> Xiang-Yu Kong,<sup>b</sup>  
Hong-Guang Xu,<sup>b</sup> Wei-Jun Zheng<sup>\*bc</sup> and Hua-Jin Zhai<sup>\*a</sup>

<sup>a</sup> Nanocluster Laboratory, Institute of Molecular Science, Shanxi University, Taiyuan 030006, China

<sup>b</sup> Beijing National Laboratory for Molecular Sciences (BNLMS), State Key Laboratory of Molecular Reaction Dynamics, Institute of Chemistry, Chinese Academy of Sciences, Beijing 100190, China

<sup>c</sup> University of Chinese Academy of Sciences, Beijing 100049, China

\*E-mail: zhengwj@iccas.ac.cn; hj.zhai@sxu.edu.cn

**Figure S1.** Alternative optimized isomeric structures of  $\text{Al}_2\text{BO}_2^-$  anion cluster at the B3LYP/6-311+G(d) level. Relative energies (in kcal mol<sup>-1</sup>) are indicated at the B3LYP and single-point CCSD(T) (in *italic*) levels. The B atom is shown in blue, Al in pink, and O in red.

**Figure S2.** Alternative optimized isomeric structures of  $\text{Al}_2\text{BO}_2$  neutral cluster at the B3LYP/6-311+G(d) level. Relative energies (in kcal mol<sup>-1</sup>) are indicated at the B3LYP and single-point CCSD(T) (in *italic*) levels. The B atom is shown in blue, Al in pink, and O in red.

**Figure S3.** Alternative optimized isomeric structures of  $\text{Al}_3\text{BO}_2^-$  anion cluster at the B3LYP/6-311+G(d) level. Relative energies (in kcal mol<sup>-1</sup>) are indicated at the

B3LYP and single-point CCSD(T) (in *italic*) levels. The B atom is shown in blue, Al in pink, and O in red.

- Figure S4.** Alternative optimized isomeric structures of  $\text{Al}_3\text{BO}_2$  neutral cluster at the B3LYP/6-311+G(d) level. Relative energies (in  $\text{kcal mol}^{-1}$ ) are indicated at the B3LYP and single-point CCSD(T) (in *italic*) levels. The B atom is shown in blue, Al in pink, and O in red.
- Figure S5.** Simulated photoelectron spectra of  $\text{Al}_3\text{BO}_2^-$  cluster on the bases of isomers (b) **3b** ( $C_s, {}^2A''$ ) and (c) **3c** ( $C_s, {}^2A'$ ), as compared to experimental data at (a) 266 nm (4.661 eV). The simulations were done at the time-dependent B3LYP/6-311+G(d) (TD-B3LYP) level, by fitting calculated VDEs with unit-area Gaussian functions of 0.04 eV half-width.
- Figure S6.** Chemical bonding in  $\text{Al}_2\text{BO}_2^-$  **2a** cluster. (a) AdNDP bonding pattern. Occupation numbers (ONs) are shown. (b) Canonical molecular orbitals (CMOs).
- Figure S7.** Chemical bonding in  $\text{Al}_2\text{BO}_2^-$  **2b** cluster. (a) AdNDP bonding pattern. ONs are shown. (b) CMOs.
- Figure S8.** Chemical bonding in  $\text{Al}_3\text{BO}_2^-$  **3a** cluster. (a) AdNDP bonding pattern; one extra electron is added in the analysis because the current version of AdNDP program applies for closed-shell species only. ONs are shown. (b) CMOs. SOMO stands for the singly occupied molecular orbital.
- Figure S9.** Chemical bonding in  $\text{Al}_3\text{BO}_2^-$  **3d** cluster. (a) AdNDP bonding pattern; one extra electron is added in the analysis because the current version of AdNDP program applies for closed-shell species only. ONs are shown. (b) CMOs. SOMO stands for the singly occupied molecular orbital.

**Figure S1.** Alternative optimized isomeric structures of  $\text{Al}_2\text{BO}_2^-$  anion cluster at the B3LYP/6-311+G(d) level. Relative energies (in kcal mol $^{-1}$ ) are indicated at the B3LYP and single-point CCSD(T) (in *italic>*) levels. The B atom is shown in blue, Al in pink, and O in red.

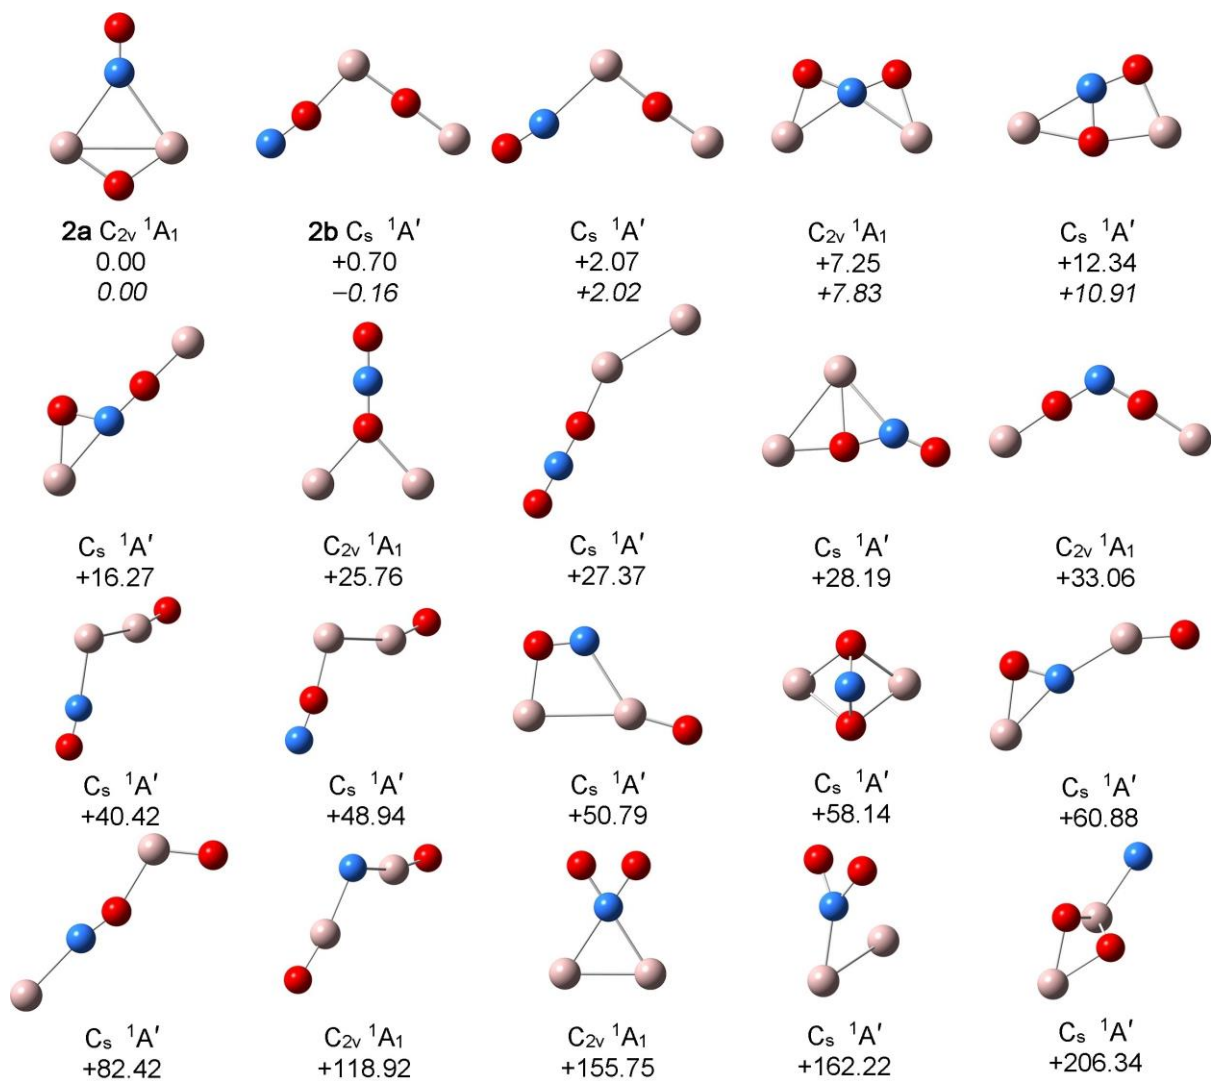

**Figure S2.** Alternative optimized isomeric structures of  $\text{Al}_2\text{BO}_2$  neutral cluster at the B3LYP/6-311+G(d) level. Relative energies (in  $\text{kcal mol}^{-1}$ ) are indicated at the B3LYP and single-point CCSD(T) (in *italic*) levels. The B atom is shown in blue, Al in pink, and O in red.

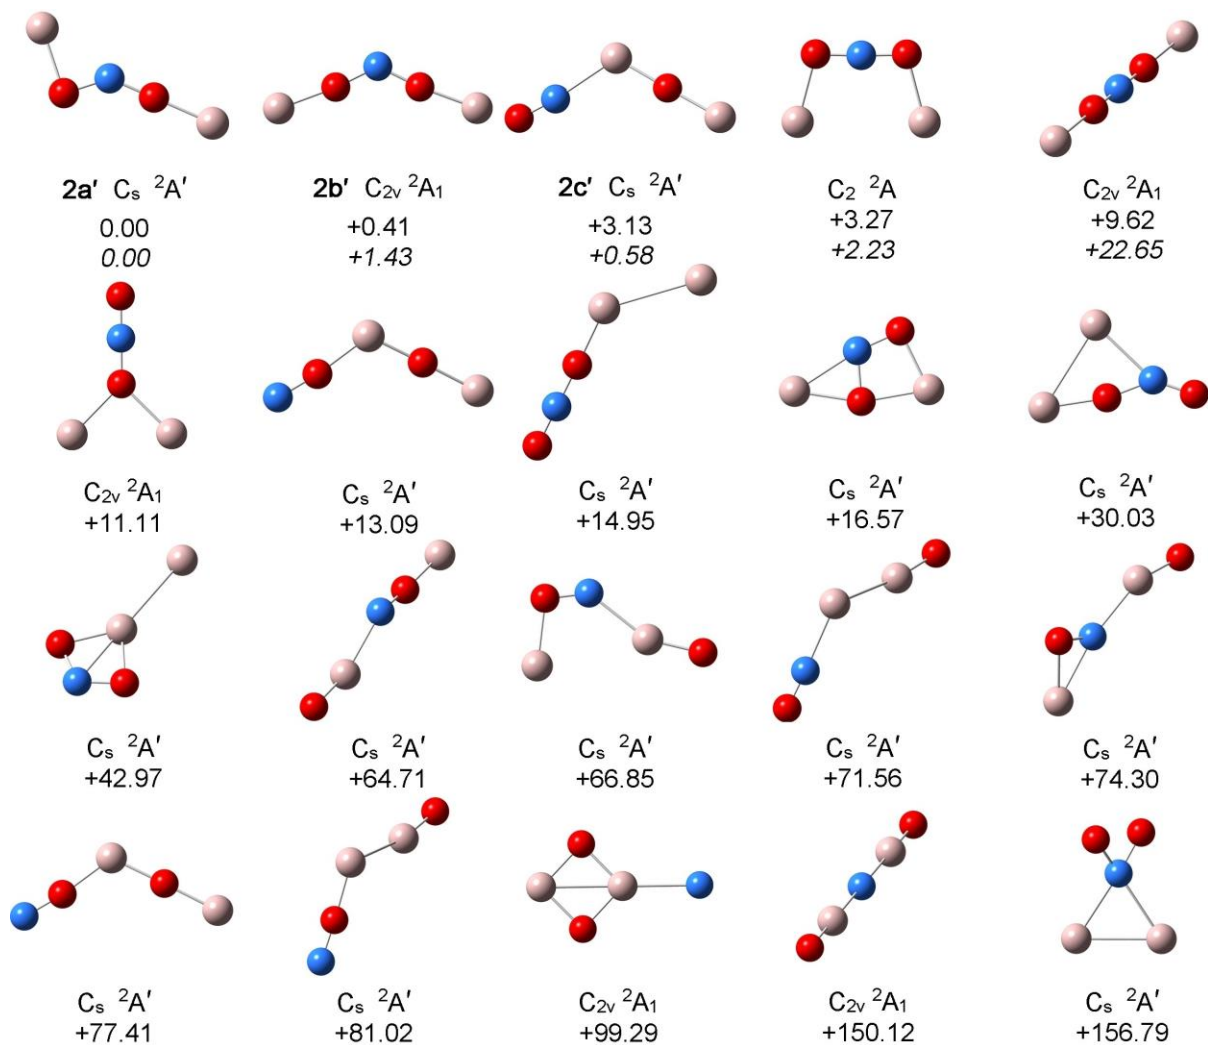

**Figure S3.** Alternative optimized isomeric structures of  $\text{Al}_3\text{BO}_2^-$  anion cluster at the B3LYP/6-311+G(d) level. Relative energies (in kcal mol $^{-1}$ ) are indicated at the B3LYP and single-point CCSD(T) (in *italic>*) levels. The B atom is shown in blue, Al in pink, and O in red.

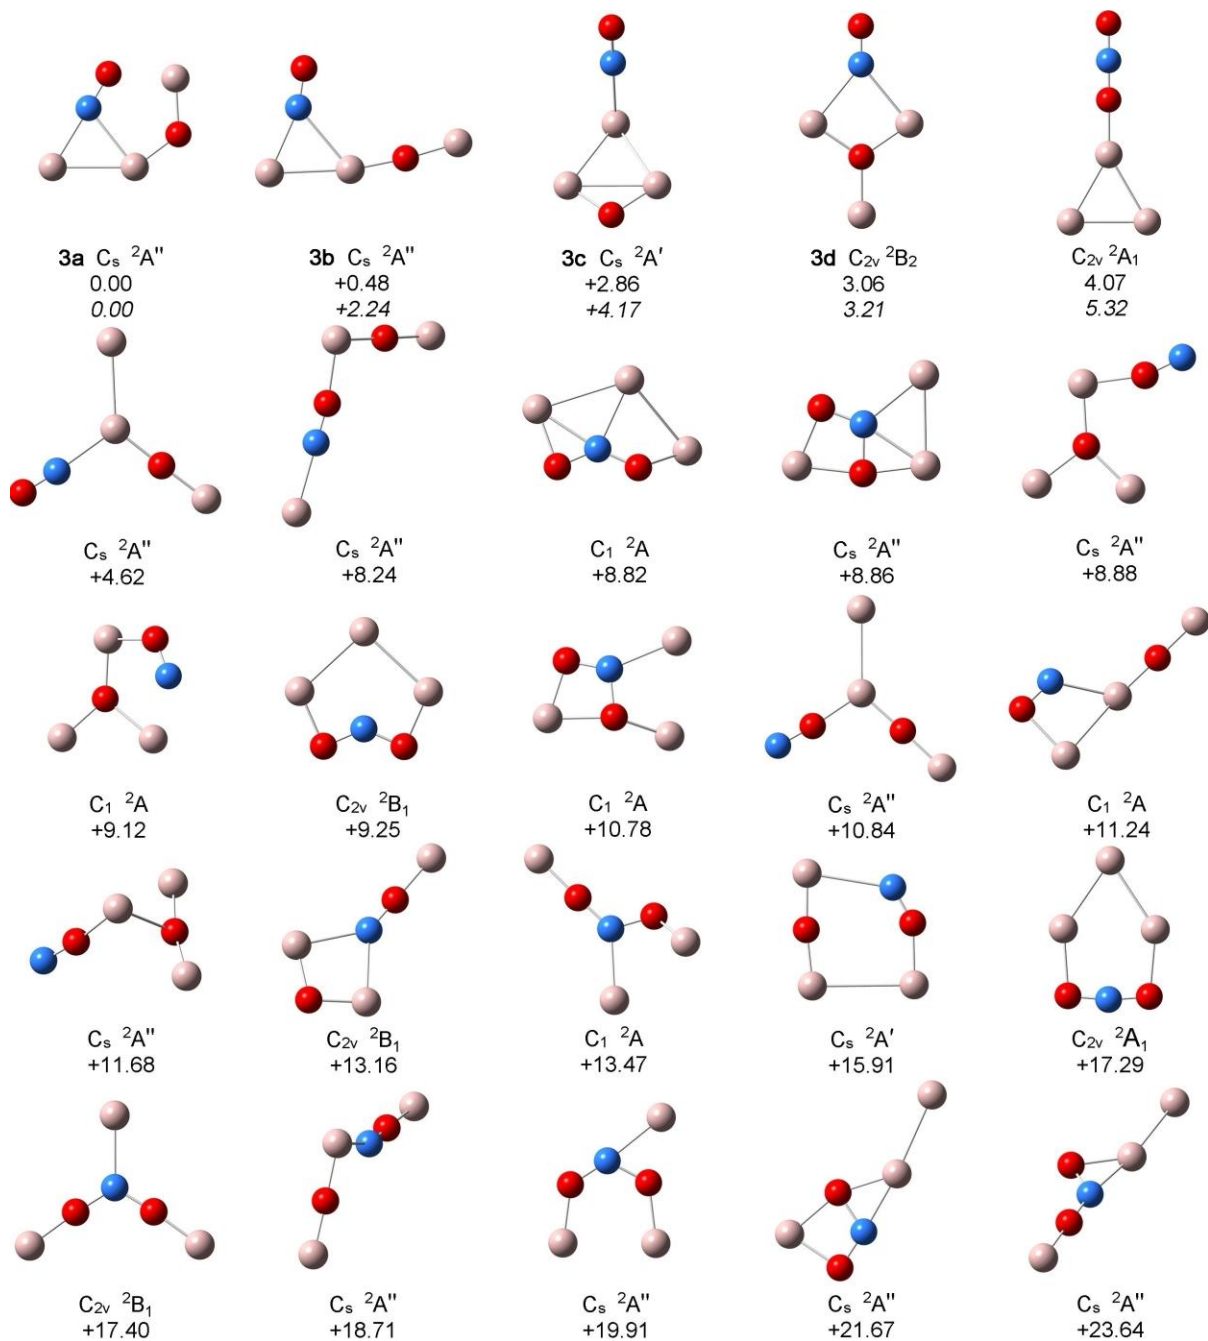

**Figure S4.** Alternative optimized isomeric structures of  $\text{Al}_3\text{BO}_2$  neutral cluster at the B3LYP/6-311+G(d) level. Relative energies (in  $\text{kcal mol}^{-1}$ ) are indicated at the B3LYP and single-point CCSD(T) (in *italic>*) levels. The B atom is shown in blue, Al in pink, and O in red.

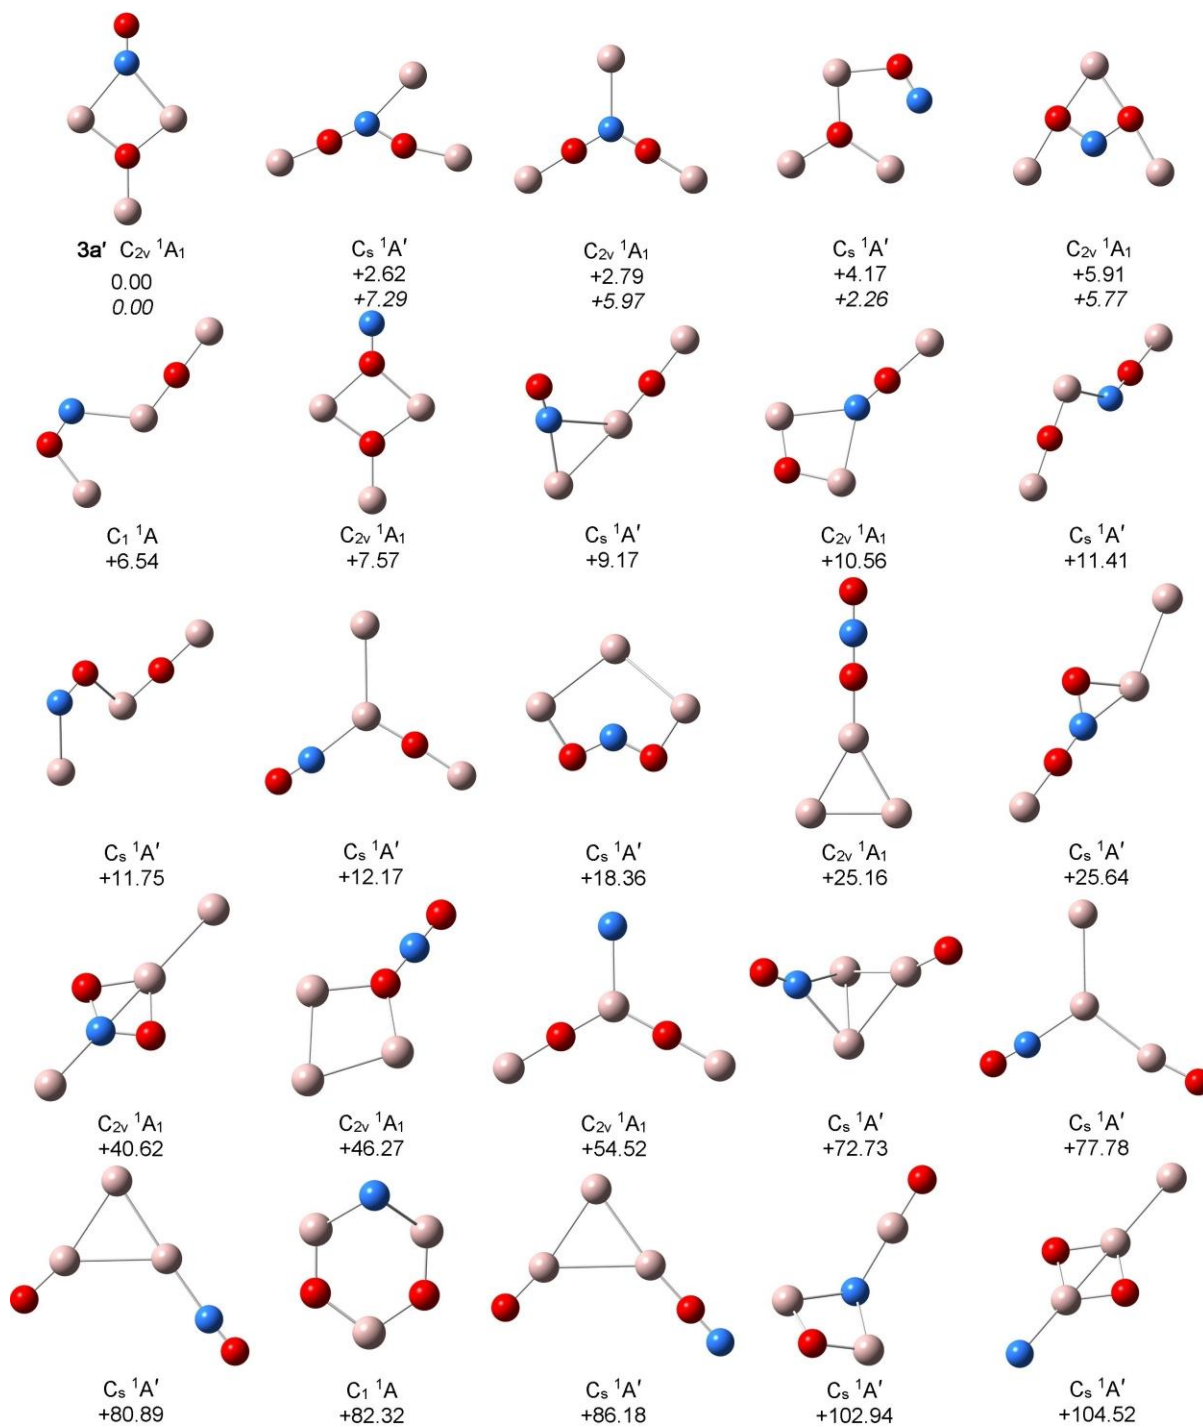

**Figure S5.** Simulated photoelectron spectra of  $\text{Al}_3\text{BO}_2^-$  cluster on the bases of isomers (b) **3b** ( $C_s, ^2A''$ ) and (c) **3c** ( $C_s, ^2A'$ ), as compared to experimental data at (a) 266 nm (4.661 eV). The simulations were done at the time-dependent B3LYP/6-311+G(d) (TD-B3LYP) level, by fitting calculated VDEs with unit-area Gaussian functions of 0.04 eV half-width.

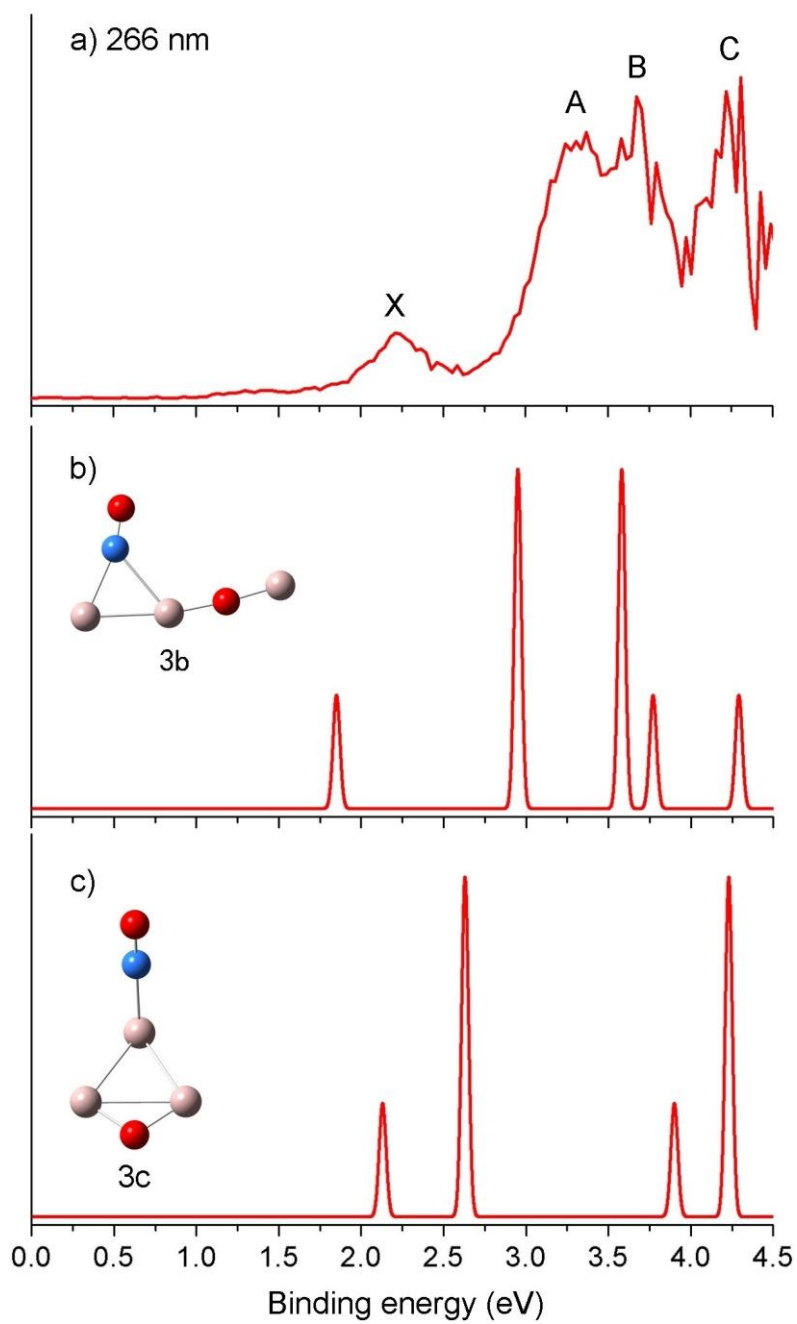

**Figure S6.** Chemical bonding in  $\text{Al}_2\text{BO}_2^-$  **2a** cluster. (a) AdNDP bonding pattern. Occupation numbers (ONs) are shown. (b) Canonical molecular orbitals (CMOs).

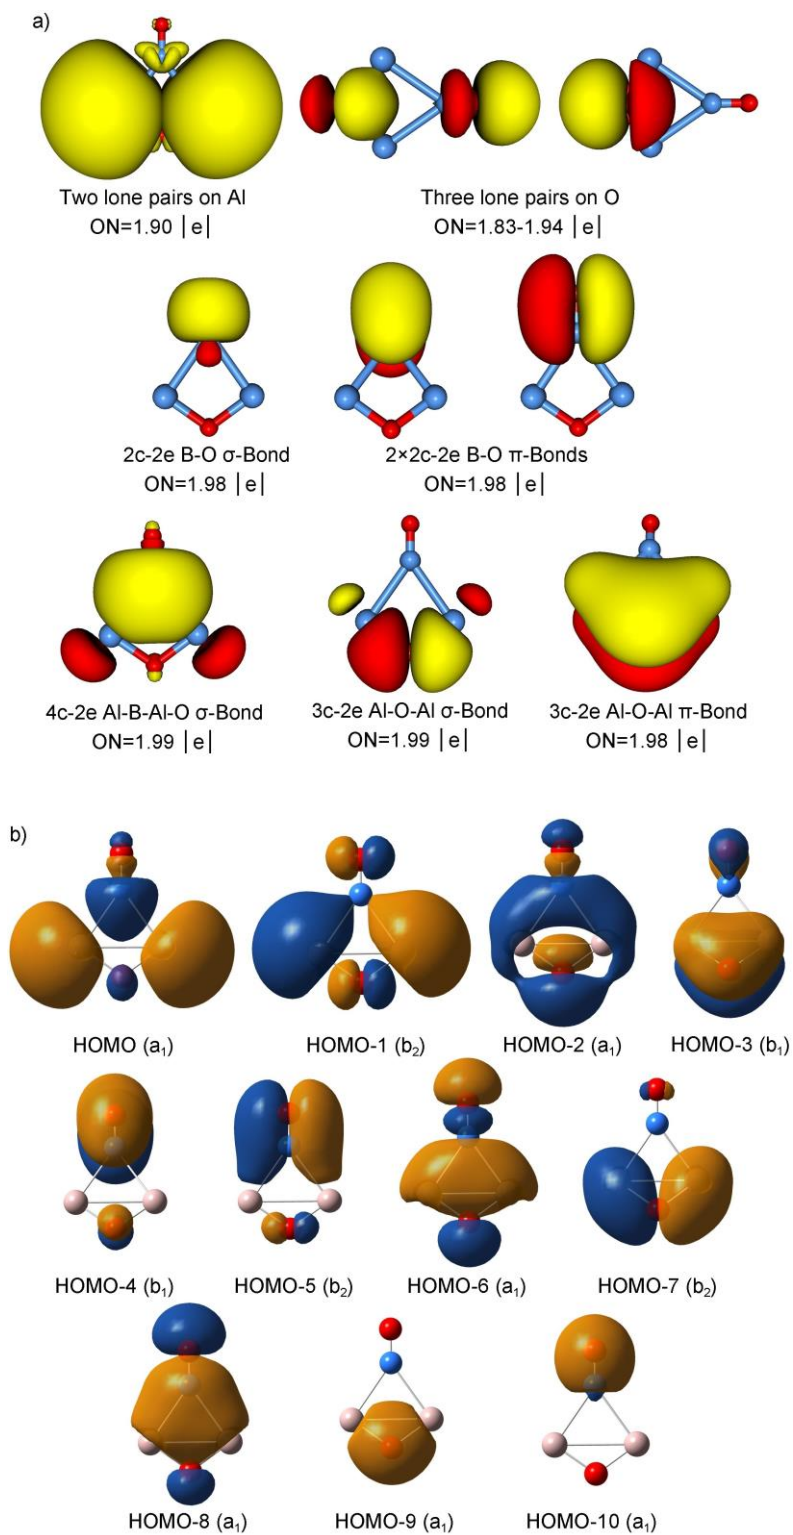



**Figure S7.** Chemical bonding in  $\text{Al}_2\text{BO}_2^-$  **2b** cluster. (a) AdNDP bonding pattern. ONs are shown. (b) CMOs.

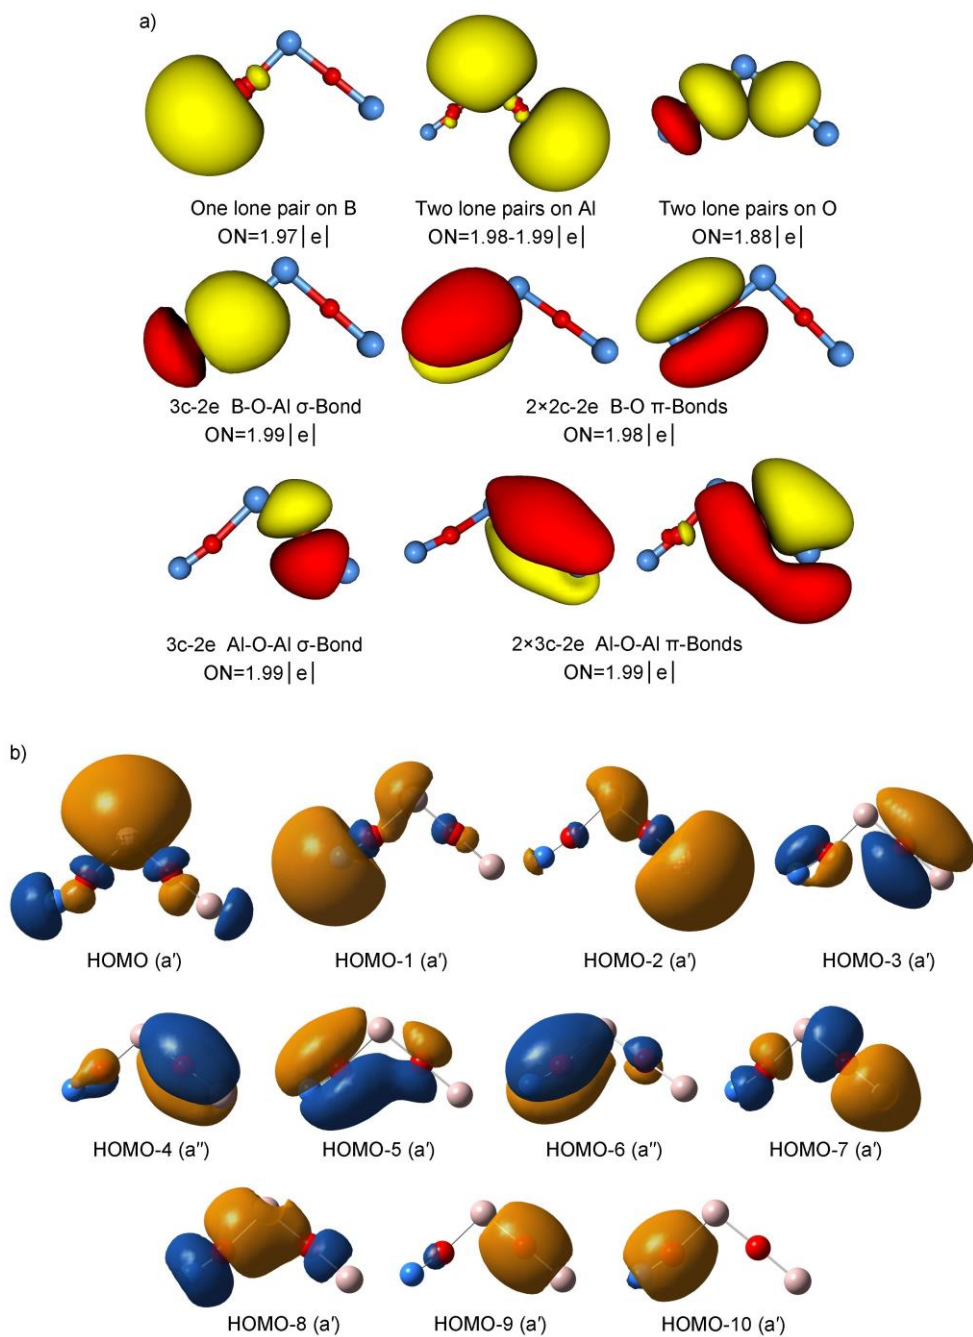

**Figure S8.** Chemical bonding in  $\text{Al}_3\text{BO}_2^-$  **3a** cluster. (a) AdNDP bonding pattern; one extra electron is added in the analysis because the current version of AdNDP program applies for closed-shell species only. ONs are shown. (b) CMOs. SOMO stands for the singly occupied molecular orbital.

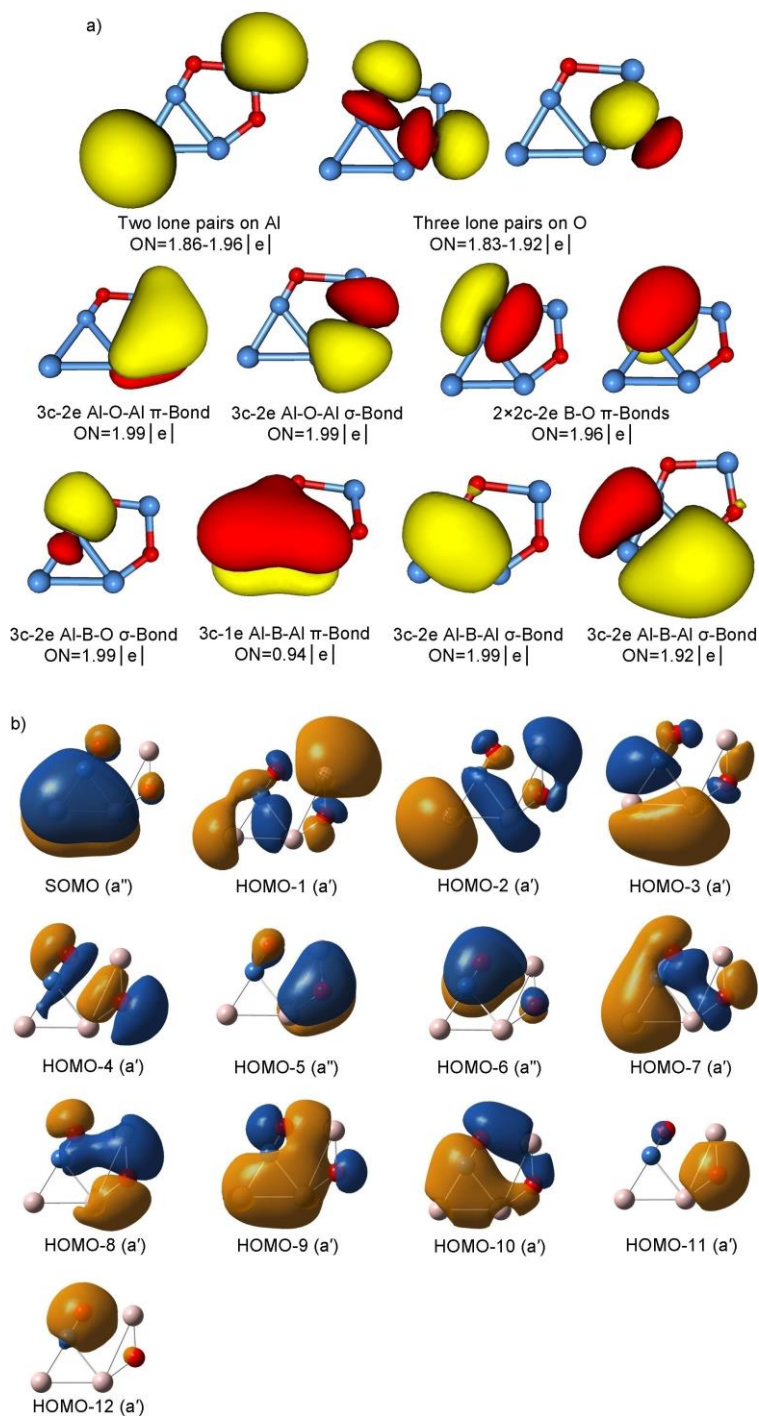

**Figure S9.** Chemical bonding in  $\text{Al}_3\text{BO}_2^-$  **3d** cluster. (a) AdNDP bonding pattern; one extra electron is added in the analysis because the current version of AdNDP program applies for closed-shell species only. ONs are shown. (b) CMOs. SOMO stands for the singly occupied molecular orbital.

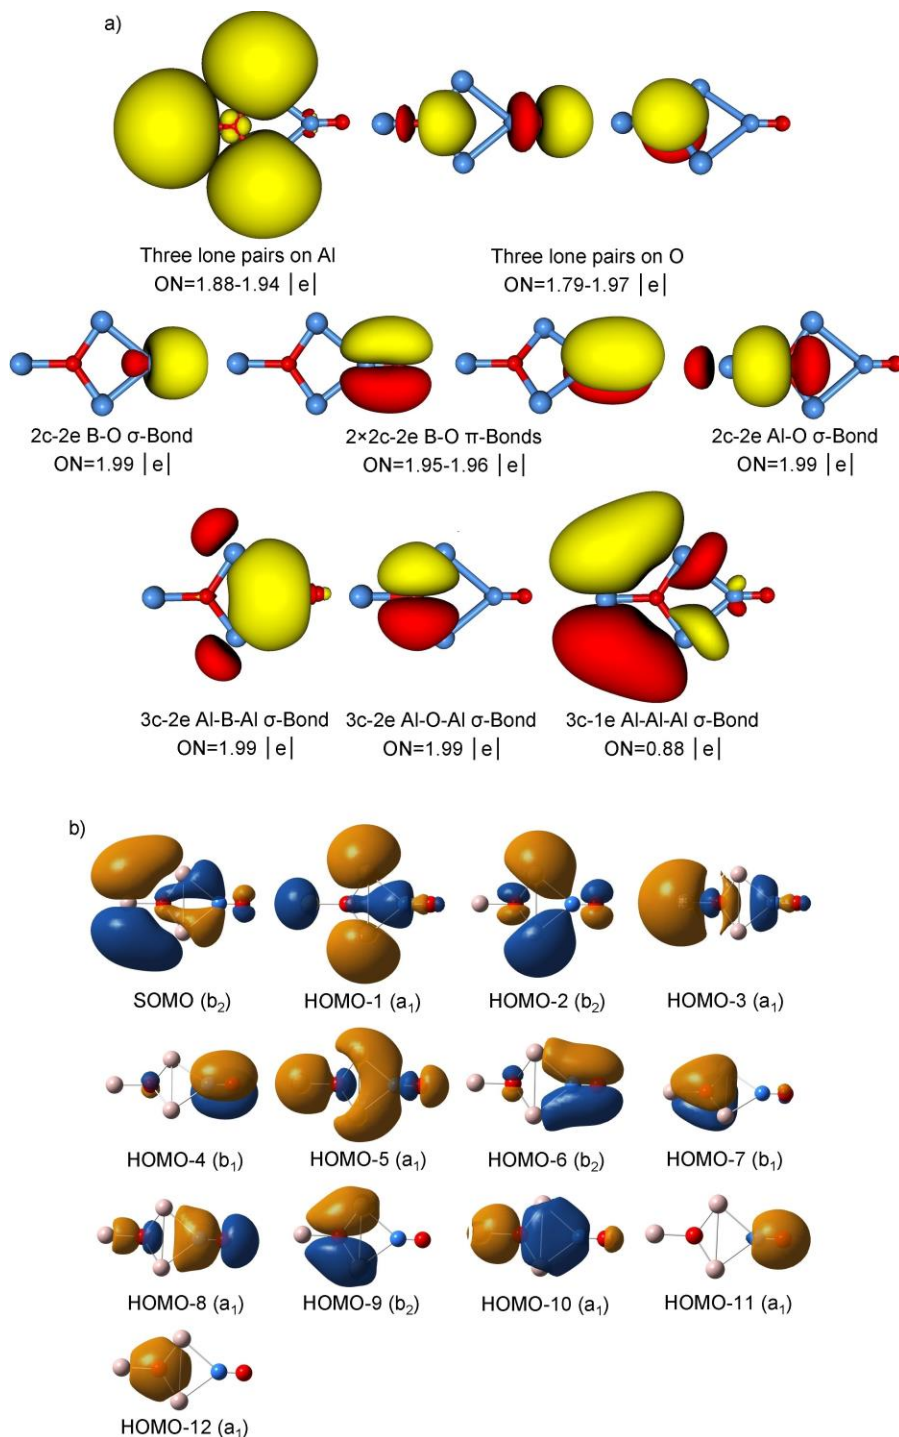

Supplement: c7cp08512e1.pdf [file c7cp08512e1.pdf]
